# Supplementary material
Source: PubMed Central journal article supplement (PMC3206228)
Supplement: NIHMS330609-supplement-Supporting.pdf [file NIHMS330609-supplement-Supporting.pdf]

## Supporting information

Posttranslational modifications of the photoreceptor-specific ABC transporter ABCA4<sup>‡</sup>

*Yaroslav Tsybovsky<sup>‡1</sup>, Benlian Wang<sup>§1</sup>, Faraz Quazi<sup>@</sup>, Robert S. Molday<sup>@</sup>, Krzysztof Palczewski<sup>‡\*</sup>*

<sup>‡</sup>Department of Pharmacology and <sup>§</sup>Center for Proteomics and Mass Spectrometry, School of Medicine, Case Western Reserve University, Cleveland, Ohio 44106, USA

<sup>@</sup>Department of Biochemistry and Molecular Biology, Centre for Macular Research, University of British Columbia, Vancouver, BC, V6T 1Z3 Canada

<sup>1</sup>Equal contributions

\*To whom correspondence should be addressed: E-mail: Krzysztof Palczewski

(kxp65@cwru.edu). Phone: (216) 368-4631. Fax: (216) 368-1300.

**Table S1.** Combined trypsin/chymotrypsin sequence coverage of native bovine ABCA4<sup>1</sup>.

| Region        | Position in sequence | Glycosylated ABCA4 | Deglycosylated ABCA4 |
|---------------|----------------------|--------------------|----------------------|
| ECD1          | 46 - 651             | 82%                | 85%                  |
| ECD2          | 1392 – 1677          | 85%                | 90%                  |
| Cyto1         | 856 – 1370           | 88%                | 88%                  |
| Cyto2         | 1897 – 2281          | 97%                | 91%                  |
| Transmembrane | 24 – 45              | 69%                | 52%                  |
|               | 652 – 855            |                    |                      |
|               | 1371 – 1391          |                    |                      |
|               | 1678 - 1896          |                    |                      |
| Total         |                      | 84%                | 81%                  |

<sup>1</sup>Mass spectrometry was performed as described in Experimental Procedures. ECD1, ECD2, Cyto1, Cyto2: exocytosolic domains 1 and 2, cytosolic domains 1 and 2, respectively.

**Table S2.** Glycosylated peptides and composition of oligosaccharides in native bovine ABCA4<sup>1</sup>.

| N-glycosylation site | Peptide sequence                | Observed N-glycopeptide m/z | Glycan composition                               |
|----------------------|---------------------------------|-----------------------------|--------------------------------------------------|
| N415                 | NANSTFEELER                     | 1344.54(2+)                 | Hex6(HexNAc) <sub>2</sub>                        |
|                      |                                 | 1425.58(2+)                 | Hex7(HexNAc) <sub>2</sub>                        |
|                      |                                 | 1506.60(2+)                 | Hex8(HexNAc) <sub>2</sub>                        |
|                      |                                 | 1587.63(2+)                 | Hex9(HexNAc) <sub>2</sub>                        |
| N504                 | DIFNITDR                        | 1206.99(2+)                 | Hex2(HexNAc)1+Hex3(HexNAc) <sub>2</sub>          |
|                      |                                 | 1288.04(2+)                 | Hex3(HexNAc)1+Hex3(HexNAc) <sub>2</sub>          |
|                      |                                 | 1352.56(2+)                 | Hex2(HexNAc)1(NeuAc)1+Hex3(HexNAc) <sub>2</sub>  |
|                      |                                 | 1433.59(2+)                 | Hex3(HexNAc)1(NeuAc)1+Hex3(HexNAc) <sub>2</sub>  |
|                      |                                 | 1328.03(2+)                 | Hex3(HexNAc)1(phos)1+Hex3(HexNAc) <sub>2</sub>   |
| N1455                | CLKKEWLPEFPCGNSSPWK             | 1153.83(3+)                 | (HexNAc)1+Hex <sub>3</sub> (HexNAc) <sub>2</sub> |
|                      |                                 | 1221.53(3+)                 | (HexNAc)2+Hex <sub>3</sub> (HexNAc) <sub>2</sub> |
| N1527                | STEILQDLTDRNVSDFLVK             | 1137.20(3+)                 | Hex <sub>5</sub> (HexNAc) <sub>2</sub>           |
|                      |                                 | 1191.22(3+)                 | Hex <sub>6</sub> (HexNAc) <sub>2</sub>           |
|                      |                                 | 1245.24(3+)                 | Hex <sub>7</sub> (HexNAc) <sub>2</sub>           |
|                      |                                 | 1299.26(3+)                 | Hex <sub>8</sub> (HexNAc) <sub>2</sub>           |
|                      |                                 | 1353.28(3+)                 | Hex <sub>9</sub> (HexNAc) <sub>2</sub>           |
| N1586                | LPAPPFTGEALVGFLSDLGQLMNVSGGPMTR | 1065.51(4+)                 | Hex <sub>4</sub> (HexNAc) <sub>2</sub>           |
|                      |                                 | 1106.02(4+)                 | Hex <sub>5</sub> (HexNAc) <sub>2</sub>           |
|                      |                                 | 1146.53(4+)                 | Hex <sub>6</sub> (HexNAc) <sub>2</sub>           |
| N1660                | DKNPEEYGITVISQPLNLTK            | 1213.24(3+)                 | Hex <sub>6</sub> (HexNAc) <sub>2</sub>           |
|                      |                                 | 1267.26(3+)                 | Hex <sub>7</sub> (HexNAc) <sub>2</sub>           |
|                      |                                 | 1321.28(3+)                 | Hex <sub>8</sub> (HexNAc) <sub>2</sub>           |
|                      |                                 | 1375.30(3+)                 | Hex <sub>9</sub> (HexNAc) <sub>2</sub>           |

<sup>1</sup>Mass spectrometry was performed as described in Experimental Procedures. Hex, hexose; HexNAc, N-acetylhexosamine; NeuAc, N-acetylneuraminic acid; phos, phosphate.

**Table S3.** Specificities of lectins used in this study<sup>1</sup>.

| Abbreviation | Full name                                            | Specificity                                                                                                | Binding detected? |
|--------------|------------------------------------------------------|------------------------------------------------------------------------------------------------------------|-------------------|
| ConA         | Concanavalin A                                       | $\alpha$ -linked mannose                                                                                   | yes               |
| LCA          | <i>Lens culinaris</i> agglutinin                     | $\alpha$ -linked mannose                                                                                   | yes               |
| PSA          | <i>Pisum sativum</i> agglutinin                      | $\alpha$ -linked mannose-containing oligosaccharides                                                       | yes               |
| WGA          | Wheat germ agglutinin                                | N-acetylglucosamine and sialic acid                                                                        | yes               |
| Suc. WGA     | Succinylated WGA                                     | N-acetylglucosamine                                                                                        | yes               |
| MAL          | <i>Maackia amurensis</i> lectin II                   | ( $\alpha$ -2,3) linked sialic acid                                                                        | yes               |
| UEA-I        | <i>Ulex europaeus</i> agglutinin I                   | $\alpha$ -linked fucose                                                                                    | no                |
| RCA120       | <i>Ricinus communis</i> agglutinin I                 | oligosaccharides ending in galactose; N-acetylgalactosamine                                                | no                |
| DBA          | <i>Dolichos biflorus</i> agglutinin                  | $\alpha$ -linked N-acetylgalactosamine                                                                     | no                |
| GSL-I        | <i>Griffonia (Bandeiraea) simplicifolia</i> lectin I | $\alpha$ -linked N-acetylgalactosamine                                                                     | no                |
| SBA          | Soybean agglutinin                                   | terminal $\alpha$ - or $\beta$ -linked N-acetylgalactosamine, galactose                                    | no                |
| PNA          | Peanut agglutinin                                    | galactosyl ( $\beta$ -1,3) N-acetylgalactosamine                                                           | no                |
| PHA-E, PHA-L | <i>Phaseolus vulgaris</i> agglutinin E and L         | terminal galactose, N-acetylglucosamine and mannose residues of complex glycans on mammalian glycoproteins | no                |

<sup>1</sup>Details of the lectin binding assays are explained in Experimental Procedures.

1 MGFARQIKLL LWKNWTLRKR QKIRFVVELV WPLSLFLVLI WLRNVNPLYS KHECHFPNKA MPSAGMLPWL QGIFCNVNNP CFQSPTAGES PGIVSNYNNS  
 101 ILARVYRDFQ ELLMADAPESQ HLGQVWRELK TLSQLMNTLR MHPERIAGRG IRIREVLKDD EMLTLFLVKN IGLSDSVVYL LVNSQVRPEQ FARGVPDLML  
 201 KDIACSEALL ERFLIFPQRR AAQTVRGS LC SLSQGT LQWM EDTLYANVDF FKLFHVFPRL LDSRSQGMNL RSWGRILSDM SPRIQEFIHR PSVQDLLWVT  
 301 RPLVQTGGPE TFTQLMGILS DL LCGYPEGG GSRVFSFNWY EDN NYKAF LG IDSTRKDPIY SYDERTTFC NALIQSLESN PLTKIAWRAA KPLLMGKILF  
 401 TPDSPAT RRI LKNANSTFEE LERVRKLVKV WEEVGPQIWY FFDKSTQMSM IRD TLENPTV KAFWNRQLGE EGITAEAVLN FLYNGPREGQ ADDVDNFNWR  
 501 DIFNITDRAL RLANQYLECL ILDKFESYDD EFQLTQRALS LLEENRFWAG VVFPDMHPWT SSLPPHVKYK IRMDIDVVEK TN KIKDRYWD SGPRADPVED  
 601 FRYIWGGFAY LQDMVEHGIT RSQAQEEVPV GIY LQMPYP CFVDDSFMI I LNRCFPIMV LAWIYSVSM T VKSIVLEKEL RLKETLKNQG VSNRVIWCTW  
 701 FLDSFSISM SICLLTIFIM HGRILHYSNP FILFLFLAF SIATIMQCF L LSTFFSRASL AAACSGVIYF TLYLPHILCF AWQDRITADM KMAVSLSPV  
 801 AFGFGTEYLA RFEEQVG LQ WSNIGNSPME GDEF SFLMSM KMMLLDAALY GLLAWYLDQV FPGDYGTPLP WYFLLQESYW LGEGECSTRE ERALEKTEPI  
 901 TEEMEDPEYP EGINDCFFER ELPGLVPGVC VKNLVKIFEP YGRPAVDRLN ITFYESQITA FLGHNGAGKT TTLSIMTGLL PPTSGTVLVG GKDIETNLDA  
 1001 IRQSLGMC PQ HNILFHHLTV AEHILFYAQL KGRSWDEAQL EMEAMLEDTG LHHKRNEEAR DLGGVQRKL SVAIAFVGDA KVVVLDEPTS GVPYSRRSI  
 1101 WDL LKYRSG RTIIMSTH M DEADILGDRI AIISQGRLYC SGTPLFLKNC FGTGFYLT LV RRMKTIQSQG RGREATCSCA SKGFSVRCPA CAEAITPEQV  
 1201 LDGDVNELTD MVHHHVPEAK LVE CIGQELI FLLPNKNFKQ RAYASLFREL EETLADLGLS SFGISDTPLE EIFLKVTEDL DSGHLFAGGT QOKRENINLR  
 1301 HPCSGPSEKA GQTPQGSSSH PGEPAAHPEG QPPPEREGHS RLNSGARLIV QHVQALLVKR FOHTIRSHKD FLAQIVLPAT FVFLALMLSL IIPPFGEYPA  
 1401 LTLHPWMYGQ QYTFFSMDQP DSEWLSALAD VLV NKPFGN RCLKEEWLPE FPCGNSSPWK TPSVSPDVTH LLQQQKWTAD QPS PSCRCST REKLTMLPEC  
 1501 PEGAGGLPPP QRIQRSTEIL QDLTDRNVSD FLVKTYPALI RSSLKSKFWV NEQRYGGISV GGKLPAPPFT GEALVGLSD LGQLMNVSGG PMTREAAKEM  
 1601 PAFLKQLETE DNIKVWFNNK GWHALVSFLN VAHNAILRAS LHKDKNPEEY GITVISQPLN LTKEQLSEIT VLTTSVDAV V AICVIFAMSF VPASFVLYLI  
 1701 QERVNKAKHL QFVSGVSPTT YWLTNFWLDI MNYTVSAA LV VGIFIGFQKK AYTSEN LPA LVALLMLYGW AVIPMPYPAS FLFDIPSTAY VALSCANLFI  
 1801 GINSSAITFV LELFENR TL LRINAMLRKL LIIFPHFC LG RGLIDLALSQ AVTDVYAQFG EAHSSNPFQW DLIGNLAAM AVEGVVYFLL TL LIQYQFFF  
 1901 SRWTTEPAKE PITDEDDVA EERQRIISGG NKTDILRLNE LTKVYSGTSS PAVDRLCVGV RPGE CFLLG VNGAGKTTTF KMLTGDTAVT SGDATVAGKS  
 2001 ILTNISDVHQ SMGYCQPFDA IDDLTGREH LYLYARLRGV PAEEIERVTN WSIQSLG LSL YADRLAGTYS GGNKRKLSTA IALIGCPPLV LLDEPTTGMD  
 2101 PQARRMLWNT IMGIIREERA VVLTSHSMEE CEALCTRLAI MVKGAFQCLG TIQHLKSKFG DGYIVTMKIR SPKDDLLPDL GPVEQFFQGN FPGSVQERH  
 2201 YNTLQFQVSS SSLARIFRLL VSHKDSLLIE EYSVTQT TLD QVFVNFAKQQ NETYDLPLHP RTAGASRQAK EVDKGN SAPQ G

**Fig. S1.** Sequence coverage of glycosylated native bovine ABCA4. Peptides detected after digestion by trypsin are indicated in red, and those by chymotrypsin in blue. Protein purification, enzymatic digestion and mass spectrometry experiments are described in Experimental Procedures.

1 MGFARQIKLL LWKNWTLRKR QKIRFVVELV WPLSLFLVLI WLRNVNPLYS KHECHFPNKA MPSAGMLPWL QGIFCNVNNP CFQSPTAGES PGIVSNYNNS  
101 ILARVYRDFQ ELLMDAPESQ HLGQVWRELK TLSQLMNTLR MHPERIAGRG IRIREVLKDD EMLTLFLVKN IGLSDSVVYL LVNSQVRPEQ FARGVPDLML  
201 KDIACSEALL ERFLIFPQRR AAQTVRGLC SLSQGTQWM EDTLYANVDF FKLFHFVPRL LDSRSQGMNL RSWGRILSDM SPRIQEFIHR PSVQDLLWVT  
301 RPLVQTGGPE TFTQLMGILS DLGCGYPEGG GSRVFSFNWY EDNNYKAFGL IDSTRKDPIY SYDERTTTFC NALIQSLESN PLTKIAWRAA KPLLMGKILF  
401 TPDSPATRI LKNANSTFEE LERVRKLVKV WEEVGPQIYW FFDKSTQMSM IRDTLENPTV KAFWNRQLGE EGITAEAVLN FLYNGPREGQ ADDVDNFNWR  
501 DIFNITDRAL RLANQYLECL ILDKLFESYDD EFQLTQRALS LLEENRFWAG VVFPDMHPWT SSLPPHVKYK IRMDIDVVEK TNKKIDRYWD SGPRADPVED  
601 FRYIWGGFAY LQDMVEHGIT RSQAQEEVPV GIYLQQMPYP CFVDDSFMI LNRCFPIFMV LAWIYSVSMT VKSIVLEKEL RLKETLKNQG VSNRVIWCTW  
701 FLDSFSIMSM SICLLTIFIM HGRILHYSNP FILFLFLAF SIATIMQCFL LSTFFSRASL AAACSGVIYF TLYLPHILCF AWQDRITADM KMAVSLSLPV  
801 AFGFGTEYLA RFEEQGVGLQ WSNIGNSPME GDEFSFLMSM KMMLLDAALY GLLAWYLDQV FPGDYGTPLP WYFLLQESYW LGEGGCSTRE ERALEKTEPI  
901 TEEMDEPEYP EGINDCFER ELPGLVPGVC VKNLVKIFEP YGRPAVDRLN ITFYESQITA FLGHNGAGKT TTLSIMTGLL PPTSGTVLVG GKDIETNLDA  
1001 IRQSLGMCPQ HNILFHHLTV AEHILFYAQL KGRSWEAQL EMEAMLEDTG LHHRNEEAR DLSGGVQRKL SVAIAFVGDA KVVVLDEPTS GVDPYRRSI  
1101 WDLKLYRSG RTIIMSTHHM DEADILGDRI AIISQGRLYC SGTPLFLKNC FGTGFYTLTV RRMKTIQSQG RGREATCSCA SKGFSVRCPA CAEAITPEQV  
1201 LDGDVNELTD MVHHHVPEAK LVECIGQELI FLLPNKNFKQ RAYASLREL EETLADLGLS SFGISDTPLE EIFLKVTEDL DSGHLFAGGT QQKRENINLR  
1301 HPCSGPSEKA GQTPQSSSH PEPEAAHPEG QPPPEREGHS RLNSGARLIV QHVQALLVKR FQHTIRSHKD FLAQIVLPAT FVFLALMLSL IIPPFGEYPA  
1401 LTLHPWMYGQ QYTFFSMDQP DSEWLSALAD VLVKNKPGFN RCLKEEWLPE FPCGNSSPWK TPSVSPDVTH LLQQQKWTD QPSPCRCST REKLTMLPEC  
1501 PEGAGGLPPP QRIQRSTEIL QDLTDRNVSD FLVKYTPALI RSSLKSKFW NEQRYGGISV GGKLPAPPFT GEALVGFSLD LGQLMNVSGG PMTREAAKEM  
1601 PAFLKQLETE DNIKVWFNNK GWHALVSFLN VAHNAILRAS LHKDKNPEEY GITVISQPLN LTKEQLSEIT VLTTSDAVV AICVIFAMSF VPASFVLYLI  
1701 QERVNKAKHL QFVSGVSPPT YWLTNFWDI MNYTVSAAV VGIFIGFQKK AYTSSENLP LVALLMLYGW AVIPMPYPAS FLFDIPSTAY VALSCANLFI  
1801 GINSSAITFV LLEFENNRTL LRINAMLRKL LIIPHFCLG RGLIDLALSQ AVTDVYAQFG EAHSSNPFQW DLIGKNLAAM AVEGVVYFLL TLLIQYQFFF  
1901 SRWTTEPAKE PITDEDDVA EERQRIISGG NKTDILRLNE LTKVYSGTSS PAVDRLCVGV RPGEFCGLLG VNGAGKTTTF KMLTGDTAVT SGDATVAGKS  
2001 LLTNISDVHQ SMGYCQFQDA IDDLTGREH LYLYARLRGV PAEEIERVTN WSIQSLGLSL YADRLAGTYS GGNKRKLSTA IALIGCPPLV LLDEPTGMD  
2101 PQARRMLWNT IMGIIREERA VVLTSMSMEE CEALCTRLAI MVKGAFQCLG TIQHLKSKFG DGYIVTMKIR SPKDDLLPDL GPVEQFFQGN FPGSVQREHR  
2201 YNTLQFQVSS SSLARIFRLL VSHKDSLLIE EYSVTQTTLD QVFVNFQKQ NETYDLPPLP RTAGASRQAK EVDKGNAPQ G

**Fig. S2.** Sequence coverage of ABCA4 deglycosylated with PNGase F. Seven peptides containing the N-glycosylation motif N-X-S/T (where X is any amino acid except proline) were detected based on conversion of Asn residues to Asp by PNGase F. Peptides detected after digestion by trypsin are indicated in red, and those by chymotrypsin in blue.

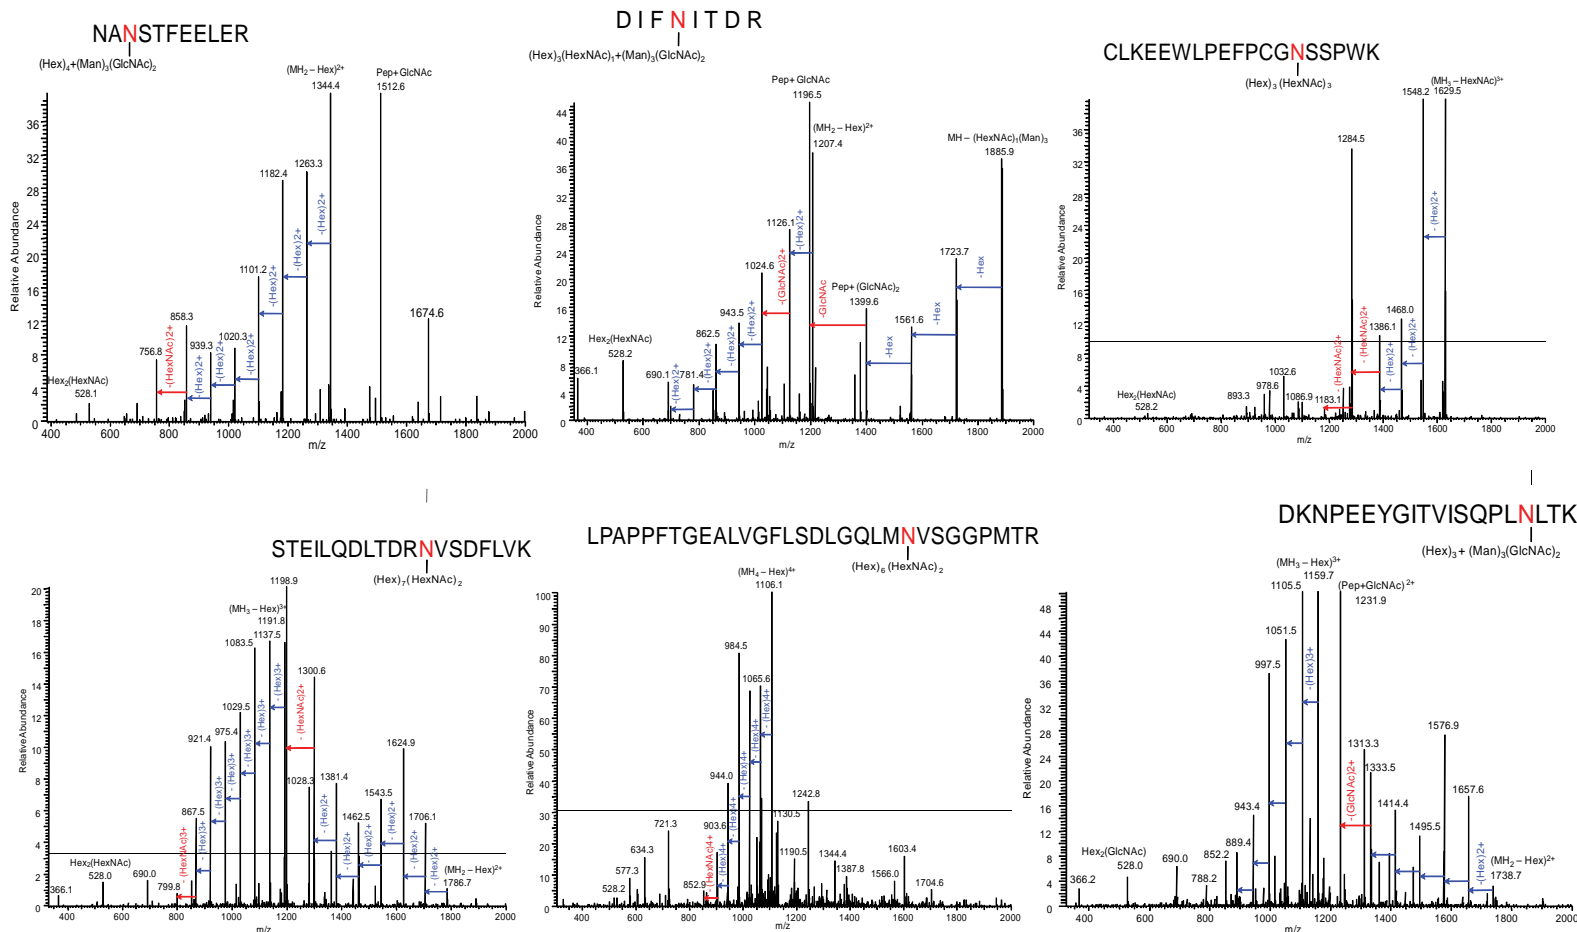

**Fig. S3.** Determination of glycan compositions in native bovine ABCA4. Representative tandem mass spectra of glycosylated peptides listed in **Table S2** reflect collision-induced dissociation of attached oligosaccharides. See Experimental Procedures and Results for details.

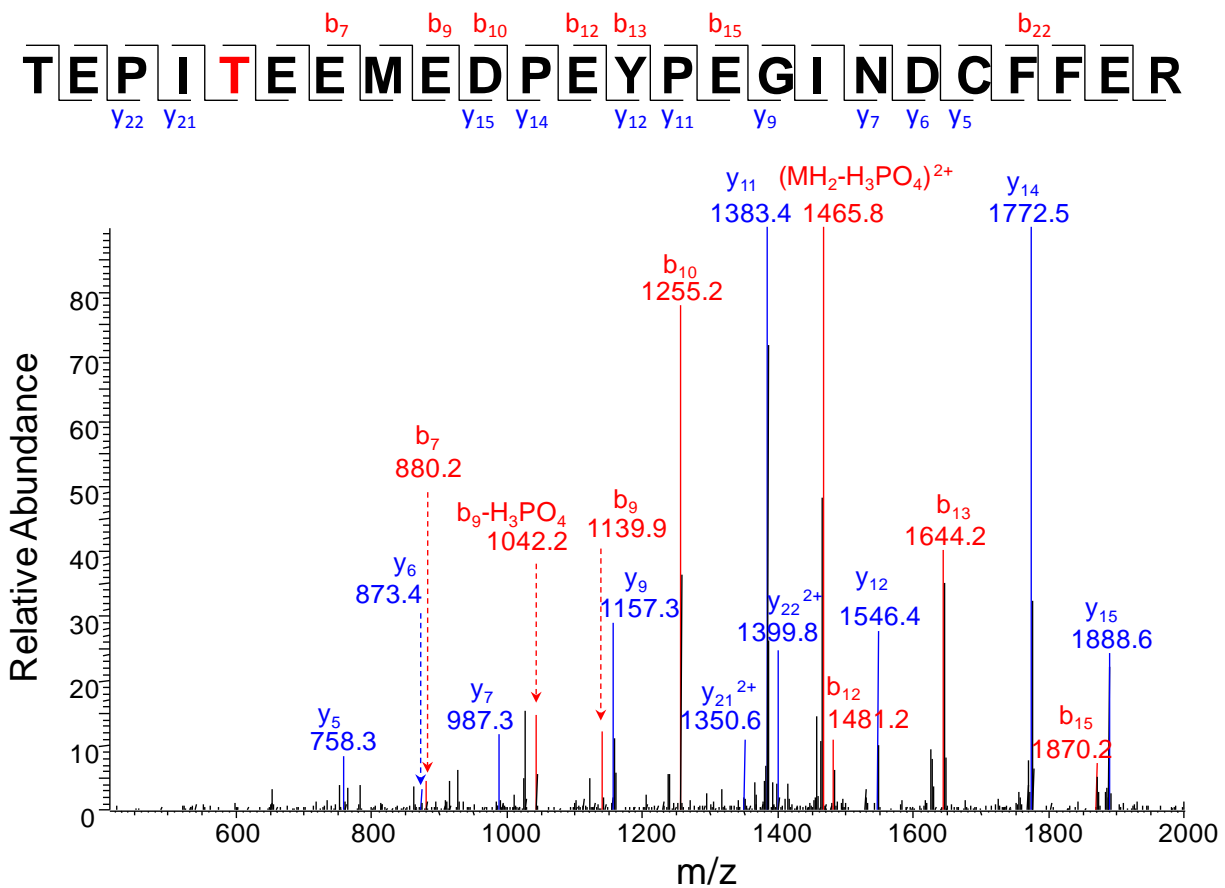

**Fig. S4.** Tandem mass spectrum of **TEPITEEMEDPEYPEGINDCFFER**, peptide 897-920, with doubly charged precursor ion  $m/z$  of 1514.09 suggests phosphorylation of T901 (shown in red).



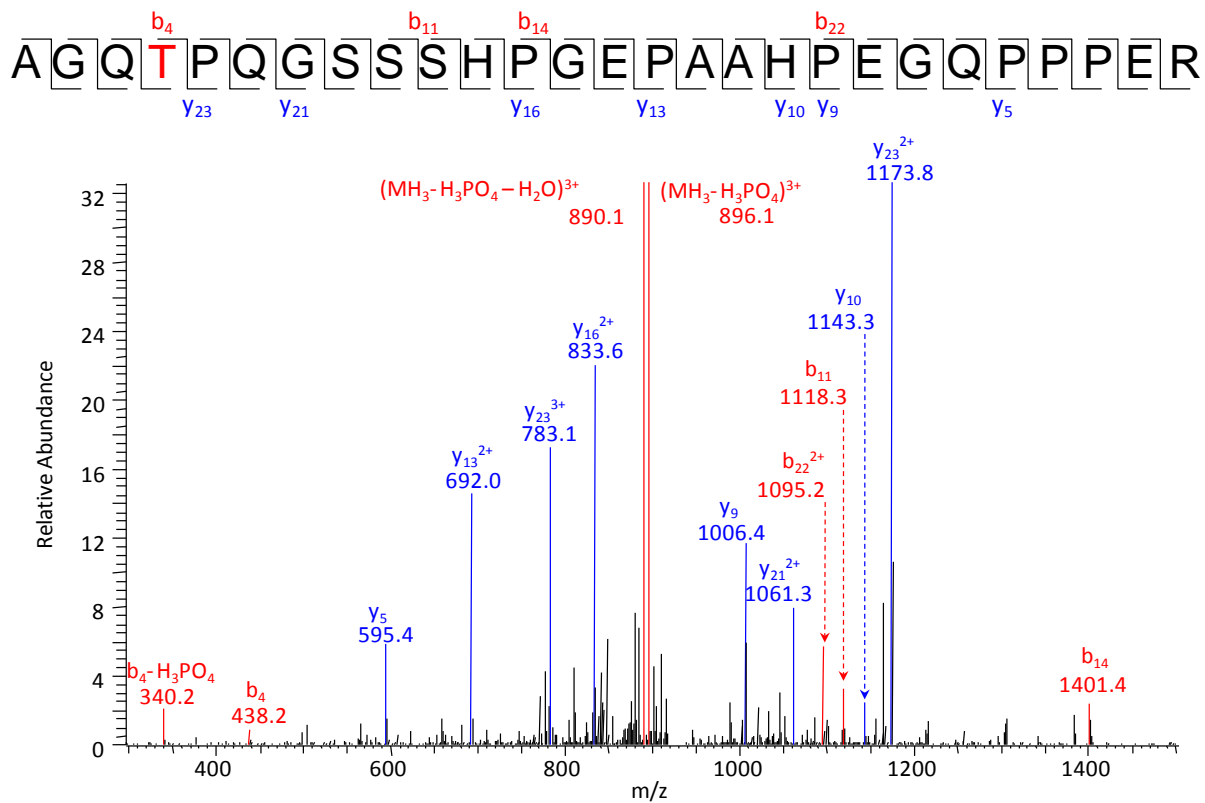

**Fig. S5.** Tandem mass spectrum of **AGQTTPQGSSSSHPGEPAAHPEGQPPPER**, peptide 1310-1336, with triply charged precursor ion m/z of 928.42. Mass shift on precursor ion of +80 Da and loss of H<sub>3</sub>PO<sub>4</sub> on precursor ion and b<sub>4</sub> ions suggest phosphorylation of T1313 (shown in red).

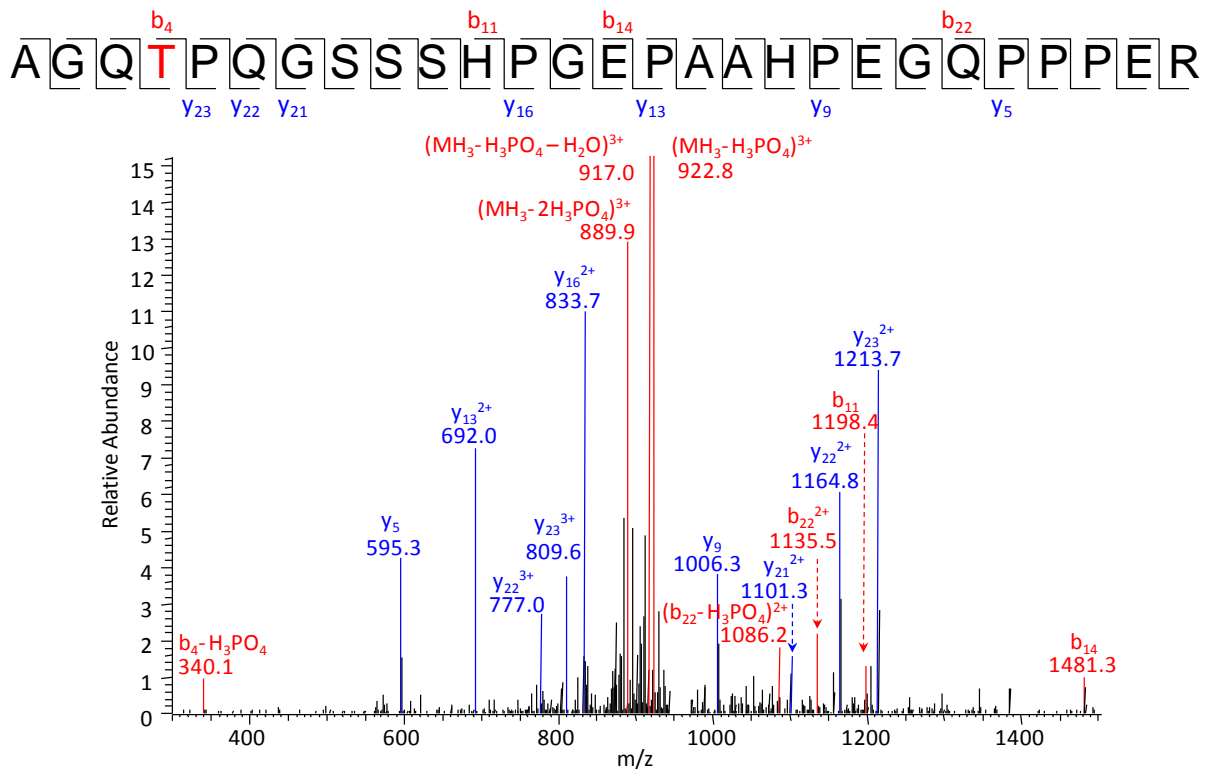

**Fig. S6.** Tandem mass spectrum of **AGQTPQGSSSSHPGEPAAHPEGQPPER**, peptide 1310-1336, with triply charged precursor ion m/z of 955.07. Mass shift of +160 Da and the neutral loss of  $2H_3PO_4$  on the precursor ion suggest two phosphorylation sites on this peptide. One site is on T1313 (shown in red), the other is among S1317 -1319.

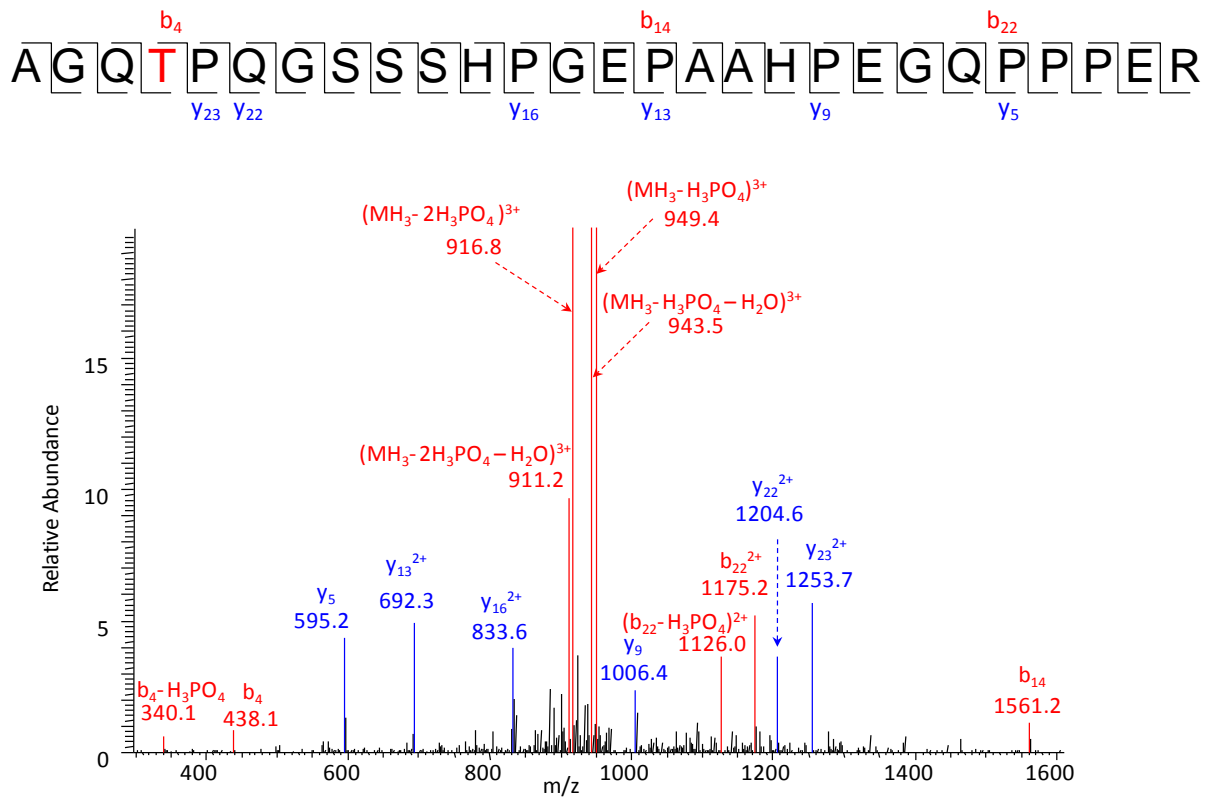

**Fig. S7.** Tandem mass spectrum of peptide **AGQTPQGSSSHHPGEPAAHPEGQPPPER**, peptide 1310-1336, with the triply charged precursor ion  $m/z$  of 981.73. Mass shift of +240 Da suggests three phosphorylation sites on this peptide. One site is on T1313 (shown in red), the two others are among S1317 -1319.

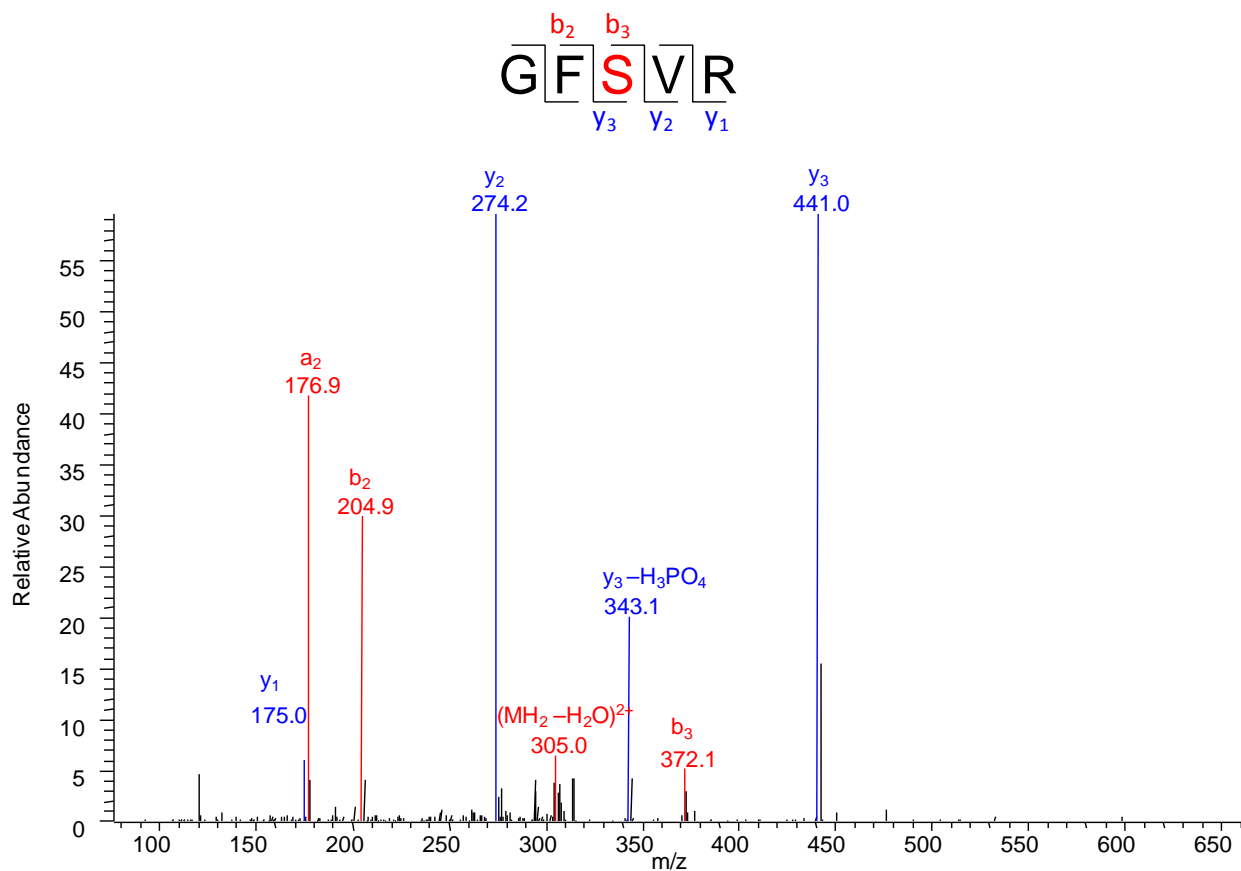

**Fig. S8.** Tandem mass spectrum of **GFSVR**, peptide 1183-1187, with doubly charged precursor ion m/z of 323.24 suggests a phosphorylation site on S1185 (shown in red).

# AGQTPQGSSSHPGEPAAHPEGQPPPER

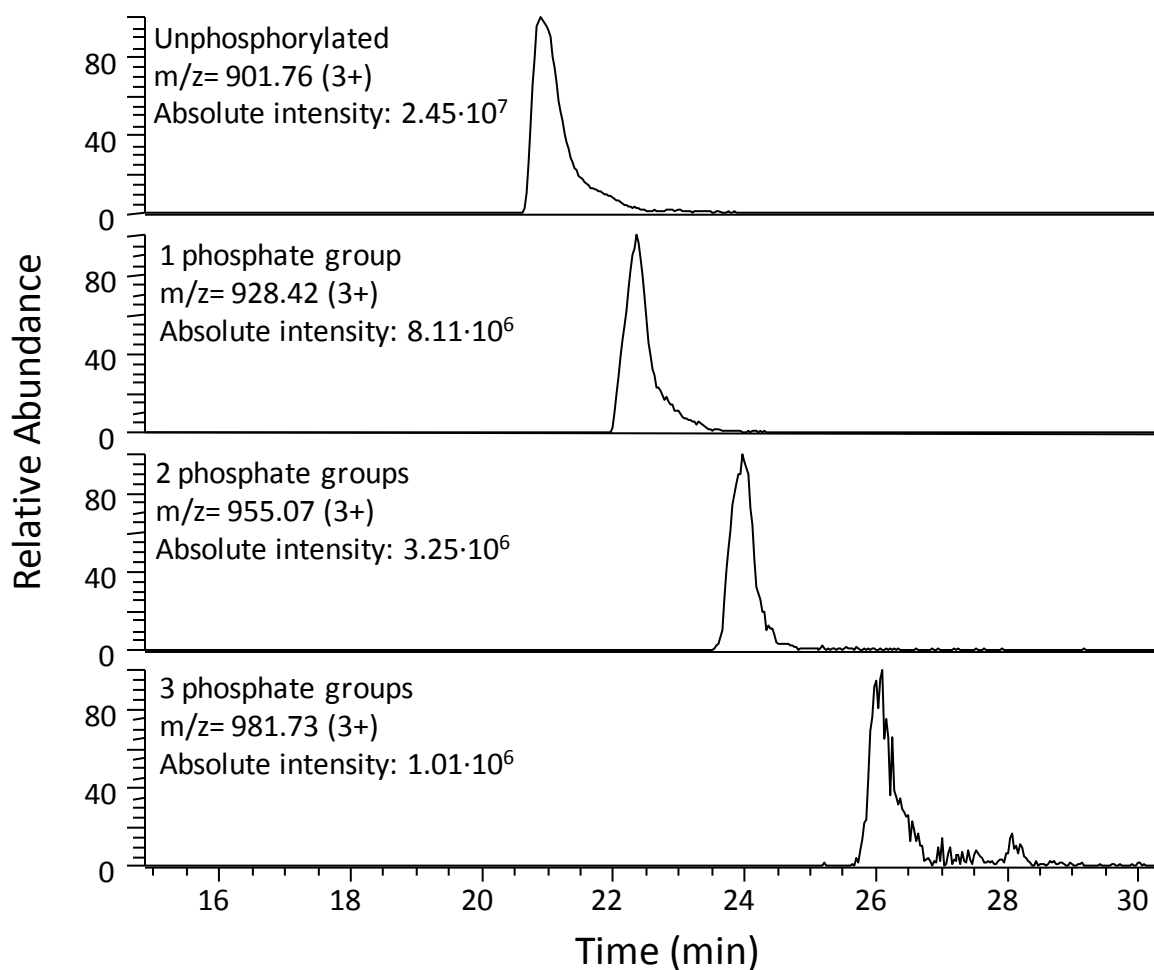

**Fig. S9.** Chromatograms showing base peaks corresponding to the **AGQTPQGSSSHPGEPAAHPEGQPPPER** peptide (residues 1310-1326) phosphorylated at 0, 1, 2 and 3 sites (top to bottom). Phosphorylation sites described in the current paper are shown in red (only two of the three consecutive Ser residues became phosphorylated). Calculated from the corresponded peak areas, the ratios of the unphosphorylated peptide to the peptides carrying 1, 2 and 3 phosphate groups are 1:0.29, 1:0.11 and 1:0.03, respectively.

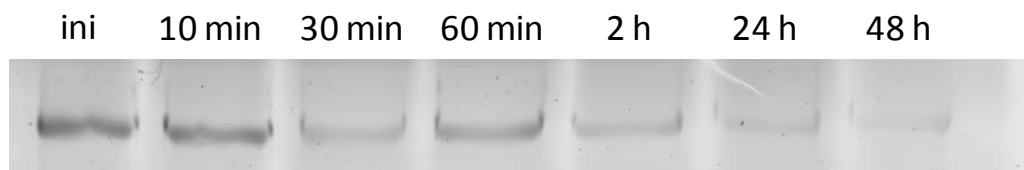

**Fig. S10.** Dephosphorylation of native bovine ABCA4 with PP2A at 4°C. PP2A treated samples of ABCA4 were resolved on a SDS-PAGE gel and stained with ProQ Diamond as described in Experimental Procedures. ini: ABCA4 before addition of PP2A.
